# Supplementary material for: Caesarean sections and for-profit status of hospitals: systematic review and meta-analysis
Source: PubMed Central journal article supplement — BMJ Open. 2017 Feb 17;7(2):e013670. doi: 10.1136/bmjopen-2016-013670 (PMC5318567; doi:10.1136/bmjopen-2016-013670), 2017-02-17
Supplement: bmjopen-2016-013670supp_appendix1.pdf [file bmjopen-2016-013670supp_appendix1.pdf]

# Appendix 1 - Search Strategy

## 1. For Medline (PubMed)

(((((((causes OR determinants OR statistics OR rates OR factors OR decision\* OR physician\* OR socioeconomic OR state medicine OR evidence-based OR hospital OR hospitals OR hospitalization OR hospitalized OR uncertain\* OR educational status OR social class OR obstetric\* OR gynecolog\* OR supply OR distribut\* OR utilization OR insurance OR choice OR attitude OR patient OR economics OR maternal OR accessib\* OR health service\* OR rural population OR urban population[Title/Abstract])) NOT medline[sb])) OR ("Decision Making"[Mesh] OR "Physician's Practice Patterns"[Mesh] OR "Socioeconomic Factors"[Mesh] OR "State Medicine"[Mesh] OR "Evidence-Based Medicine"[Mesh] OR "Hospitals"[Mesh] OR "Uncertainty"[Mesh] OR "Educational Status"[Mesh] OR "Hospital Costs"[Mesh] OR "Physician Incentive Plans"[Mesh] OR "Social Class"[Mesh] OR "Obstetrics and Gynecology Department, Hospital"[Mesh] OR "supply and distribution"[Subheading] OR "utilization"[Subheading] OR "Insurance"[Mesh] OR "Choice Behavior"[Mesh] OR "Attitude to Health"[Mesh] OR "Patient Participation"[Mesh] OR "Physician-Patient Relations"[Mesh] OR "Economics, Hospital"[Mesh] OR "Maternal Health Services"[Mesh] OR "Health Services Accessibility"[Mesh] OR "Health Services Research"[Mesh] OR "Rural Population"[Mesh] OR "Urban Population"[Mesh]))) OR factors OR rates OR statistics OR causes OR determinants AND (((((operative delivery OR caesarean section OR cesarean section OR c-section OR c section OR caesarean OR cesarean OR caesarean delivery OR cesarean delivery OR caesarean rates OR cesarean rates)))) OR cesarean section [MeSH Terms])) AND (((("Catchment Area (Health)"[Mesh] OR "Small-Area Analysis"[Mesh]))) OR (((small area analysis OR small area analyses OR medical practice variation OR regions OR geographic variation OR variation))))))

## 2. Embase (Ovid SP)

| #  | Searches                                                                                | Results | Search Type | Actions            |
|----|-----------------------------------------------------------------------------------------|---------|-------------|--------------------|
| 1  | decision making/                                                                        | 134077  | Advanced    | Display<br>More >> |
| 2  | professional practice/ or group practice/ or health care practice/ or medical practice/ | 129049  | Advanced    | Display<br>More >> |
| 3  | socioeconomics/                                                                         | 110558  | Advanced    | Display<br>More >> |
| 4  | state medicine.mp. or national health service/                                          | 54605   | Advanced    | Display<br>More >> |
| 5  | evidence based medicine/                                                                | 80825   | Advanced    | Display<br>More >> |
| 6  | hospital/                                                                               | 216188  | Advanced    | Display<br>More >> |
| 7  | uncertainty/                                                                            | 6158    | Advanced    | Display<br>More >> |
| 8  | educational status/                                                                     | 36032   | Advanced    | Display<br>More >> |
| 9  | "hospital cost"/                                                                        | 13192   | Advanced    | Display<br>More >> |
| 10 | physician incentive plans.mp. or personnel management/                                  | 49572   | Advanced    | Display<br>More >> |
| 11 | social class/                                                                           | 26291   | Advanced    | Display<br>More >> |
| 12 | hospital department/                                                                    | 21809   | Advanced    | Display<br>More >> |
| 13 | obstetrics/                                                                             | 27326   | Advanced    | Display<br>More >> |
| 14 | gynecology/                                                                             | 29917   | Advanced    | Display<br>More >> |
| 15 | 13 or 14                                                                                | 42128   | Advanced    | Display<br>More >> |

|    |                                                                                                                                                                                                            |            |                 |                              |
|----|------------------------------------------------------------------------------------------------------------------------------------------------------------------------------------------------------------|------------|-----------------|------------------------------|
| 16 | 12 and 15                                                                                                                                                                                                  | 413        | Advanced        | Display<br>More >>           |
| 17 | health care distribution/                                                                                                                                                                                  | 2333       | Advanced        | Display<br>More >>           |
| 18 | health care utilization/                                                                                                                                                                                   | 36879      | Advanced        | Display<br>More >>           |
| 19 | insurance/                                                                                                                                                                                                 | 33934      | Advanced        | Display<br>More >>           |
| 20 | choice behavior.mp.                                                                                                                                                                                        | 765        | Advanced        | Display<br>More >>           |
| 21 | attitude to health/                                                                                                                                                                                        | 81021      | Advanced        | Display<br>More >>           |
| 22 | patient participation/                                                                                                                                                                                     | 16400      | Advanced        | Display<br>More >>           |
| 23 | doctor patient relation/                                                                                                                                                                                   | 81043      | Advanced        | Display<br>More >>           |
| 24 | health economics/                                                                                                                                                                                          | 33098      | Advanced        | Display<br>More >>           |
| 25 | obstetric procedure/                                                                                                                                                                                       | 550        | Advanced        | Display<br>More >>           |
| 26 | health care access/                                                                                                                                                                                        | 34433      | Advanced        | Display                      |
| 27 | health services research/                                                                                                                                                                                  | 27579      | Advanced        | Display<br>More >>           |
| 28 | geographic distribution/                                                                                                                                                                                   | 132846     | Advanced        | Display<br>More >>           |
| 29 | rural population/                                                                                                                                                                                          | 30219      | Advanced        | Display<br>More >>           |
| 30 | urban population/                                                                                                                                                                                          | 35323      | Advanced        | Display<br>More >>           |
| 31 | causes/                                                                                                                                                                                                    | 0          | Advanced        | Delete<br>More >>            |
| 32 | determinants/                                                                                                                                                                                              | 1          | Advanced        | Display<br>More >>           |
| 33 | statistics/                                                                                                                                                                                                | 301146     | Advanced        | Display<br>More >>           |
| 34 | rates/                                                                                                                                                                                                     | 0          | Advanced        | Delete<br>More >>            |
| 35 | factors/                                                                                                                                                                                                   | 0          | Advanced        | Delete<br>More >>            |
| 36 | 1 or 2 or 3 or 4 or 5 or 6 or 7 or 8 or 9 or 10 or 11 or 16 or 17 or 18 or 19 or 20 or 21 or 22 or 23 or 24 or 25 or 26 or 27 or 29 or 30 or 32 or 33                                                      | 1340916    | Advanced        | Display<br>More >>           |
| 37 | cesarean section/                                                                                                                                                                                          | 59755      | Advanced        | Display<br>More >>           |
| 38 | (caesarean section or cesarean section or c-section or c section or caesarean or cesarean or caesarean delivery or cesarean delivery or caesarean rates or cesarean rates or operative delivery).ti,ab,tw. | 53950      | Advanced        | Display<br>Delete<br>More >> |
| 39 | 37 or 38                                                                                                                                                                                                   | 73014      | Advanced        | Display<br>More >>           |
| 40 | (small area analysis or small area analyses or small aera or medical practice variation or regions or geographic variation or variation or variations).ti,ab,tw.                                           | 964890     | Advanced        | Display<br>More >>           |
| 41 | 28 or 40                                                                                                                                                                                                   | 1082827    | Advanced        | Display<br>More >>           |
| 42 | <b>36 and 39 and 41</b>                                                                                                                                                                                    | <b>357</b> | <b>Advanced</b> | Display<br>More >>           |

### 3. Cochrane Database of Systematic Reviews

#### Caesarean section
