# Supplementary material for: Caesarean sections and for-profit status of hospitals: systematic review and meta-analysis
Source: PubMed Central journal article supplement — BMJ Open. 2017 Feb 17;7(2):e013670. doi: 10.1136/bmjopen-2016-013670 (PMC5318567; doi:10.1136/bmjopen-2016-013670), 2017-02-17
Supplement: bmjopen-2016-013670supp_appendix2.pdf [file bmjopen-2016-013670supp_appendix2.pdf]

## Appendix 2. Reported exclusion criteria

| <b>Authors</b>        | <b>Source population</b>                                           | <b>Women age 14 and below</b> | <b>Women from racial or ethnic minorities</b> | <b>Primiparae</b> | <b>Multiparae</b> | <b>Women with previous CS</b> | <b>Women with no previous CS</b> | <b>Women with uterine scars</b> | <b>Stillbirth</b> | <b>Multiple births (twin or more)</b> | <b>Not in labour</b> | <b>Cephalic presentation</b> | <b>Breach presentation</b> | <b>Other malpresentation of foetus</b> | <b>Preterm birth (less than 37 weeks)</b> | <b>Other risk factors for CS</b> |
|-----------------------|--------------------------------------------------------------------|-------------------------------|-----------------------------------------------|-------------------|-------------------|-------------------------------|----------------------------------|---------------------------------|-------------------|---------------------------------------|----------------------|------------------------------|----------------------------|----------------------------------------|-------------------------------------------|----------------------------------|
| Braveman et al.       | All births in State of California, United States                   |                               |                                               |                   | +                 | +                             |                                  |                                 | +                 | +                                     |                      |                              |                            |                                        | +                                         |                                  |
| Naiditch et al.       | All births in 944 maternity units in France                        | +                             |                                               |                   |                   | +                             |                                  |                                 | +                 | +                                     |                      |                              |                            |                                        | +                                         | +                                |
| Gomes et al. A        | All births in Ribeirão Preto, State of São Paulo, Southeast Brazil |                               |                                               |                   |                   |                               |                                  |                                 | +                 | +                                     |                      |                              |                            |                                        | +                                         |                                  |
| Gomes et al. B        | All births in Ribeirão Preto, State of São Paulo, Southeast Brazil |                               |                                               |                   |                   |                               |                                  |                                 | +                 | +                                     |                      |                              |                            |                                        | +                                         |                                  |
| Gonzalez-Perez et al. | All births in Mexico                                               |                               |                                               |                   |                   |                               |                                  |                                 |                   |                                       |                      |                              |                            |                                        |                                           |                                  |
| Korst et al.          | All births in State of California, United States                   |                               |                                               |                   |                   | +                             |                                  |                                 | +                 | +                                     | +                    |                              |                            |                                        | +                                         | +                                |
| Mossialos et al.      | All births in the three hospitals in Athens, Greece                |                               |                                               |                   |                   |                               |                                  |                                 |                   |                                       |                      |                              |                            |                                        |                                           |                                  |
| Carayol et al. A      | All births in Metropolitan France                                  |                               |                                               |                   |                   | +                             |                                  |                                 | +                 | +                                     |                      | +                            |                            | +                                      | +                                         |                                  |
| Carayol et al. B      | All births in 138 maternity units in France                        |                               |                                               |                   |                   | +                             |                                  | +                               | +                 | +                                     |                      | +                            |                            | +                                      | +                                         |                                  |
| Xirasagar and Lin     | All births in Taiwan                                               |                               |                                               |                   |                   |                               |                                  |                                 | +                 | +                                     |                      |                              |                            |                                        | +                                         | +                                |
| Coonrod et al.        | All births in State of Arizona, United States                      |                               | +                                             |                   | +                 |                               |                                  |                                 | +                 | +                                     |                      |                              | +                          | +                                      | +                                         |                                  |
| Coulm et al.          | All births in all maternity units in France                        |                               |                                               |                   |                   | +                             |                                  |                                 | +                 | +                                     |                      |                              | +                          | +                                      | +                                         | +                                |
| Huesch et al.         | All births in State of California, United States                   | +                             |                                               |                   |                   | +                             |                                  |                                 |                   |                                       |                      |                              |                            |                                        | +                                         | +                                |
| Raifman et al. A      | All births in Brazil                                               | +                             |                                               |                   |                   |                               |                                  |                                 | +                 | +                                     |                      |                              |                            |                                        | +                                         |                                  |
| Raifman et al. B      | All births in Brazil                                               | +                             |                                               |                   |                   |                               |                                  |                                 | +                 | +                                     |                      |                              |                            |                                        | +                                         |                                  |
| Schemann et al.       | All births in 81 hospitals in New South Wales, Australia           |                               |                                               | +                 |                   |                               | +                                |                                 |                   |                                       |                      |                              |                            |                                        | +                                         |                                  |
| Sebastião et al.      | All births in 122 hospitals in State of Florida, United States     |                               |                                               |                   | +                 |                               |                                  |                                 | +                 | +                                     | +                    |                              | +                          | +                                      | +                                         |                                  |
