# Supplementary material for: Caesarean sections and for-profit status of hospitals: systematic review and meta-analysis
Source: PubMed Central journal article supplement — BMJ Open. 2017 Feb 17;7(2):e013670. doi: 10.1136/bmjopen-2016-013670 (PMC5318567; doi:10.1136/bmjopen-2016-013670), 2017-02-17
Supplement: bmjopen-2016-013670supp_appendix3.pdf [file bmjopen-2016-013670supp_appendix3.pdf]

### Appendix 3. Characteristics of data used for analysis

| <b>Author</b>         | <b>Survey</b> | <b>Hospital records</b> | <b>Birth certificates/registry</b> | <b>Insurance claims</b> | <b>Census data</b> |
|-----------------------|---------------|-------------------------|------------------------------------|-------------------------|--------------------|
| Braveman et al.       |               |                         | +                                  |                         | +                  |
| Naiditch et al.       |               | +                       |                                    | +                       |                    |
| Gomes et al. A        | +             |                         |                                    |                         |                    |
| Gomes et al. B        | +             |                         |                                    |                         |                    |
| Gonzalez-Perez et al. |               |                         | +                                  |                         |                    |
| Korst et al.          |               | +                       |                                    |                         |                    |
| Mossialos et al.      |               | +                       |                                    |                         |                    |
| Carayol et al. A      | +             | +                       |                                    |                         |                    |
| Carayol et al. B      | +             | +                       |                                    |                         |                    |
| Xirasagar and Lin     |               |                         |                                    | +                       |                    |
| Coonrod et al.        |               |                         | +                                  |                         |                    |
| Coulm et al.          | +             | +                       |                                    |                         |                    |
| Huesch et al.         |               | +                       |                                    |                         |                    |
| Raifman et al. A      | +             |                         |                                    |                         |                    |
| Raifman et al. B      | +             |                         |                                    |                         |                    |
| Schemann et al.       |               | +                       |                                    |                         |                    |
| Sebastião et al.      |               | +                       | +                                  |                         |                    |
